# Supplementary material for: Hypermethylation of UCHL1 Promotes Metastasis of Nasopharyngeal Carcinoma by Suppressing Degradation of Cortactin (CTTN)
Source: MDPI journal article supplement (doi:10.3390/cells9030559), 2020-02-27
Supplement: s1 [file s1]

Archive with 4 entries (4 files):
- 2008 Cortactin Branches Out_ Roles in Regulating Protrusive Actin Dynamics.pdf
- Supplementary figures.pdf
- Supplementary Table S1.docx
- Supplementary Table S2.docx
