# Supplementary material for: Hypermethylation of UCHL1 Promotes Metastasis of Nasopharyngeal Carcinoma by Suppressing Degradation of Cortactin (CTTN)
Source: MDPI journal article supplement (doi:10.3390/cells9030559), 2020-02-27
Supplement: s1 [file s1 › Supplementary figures.pdf]

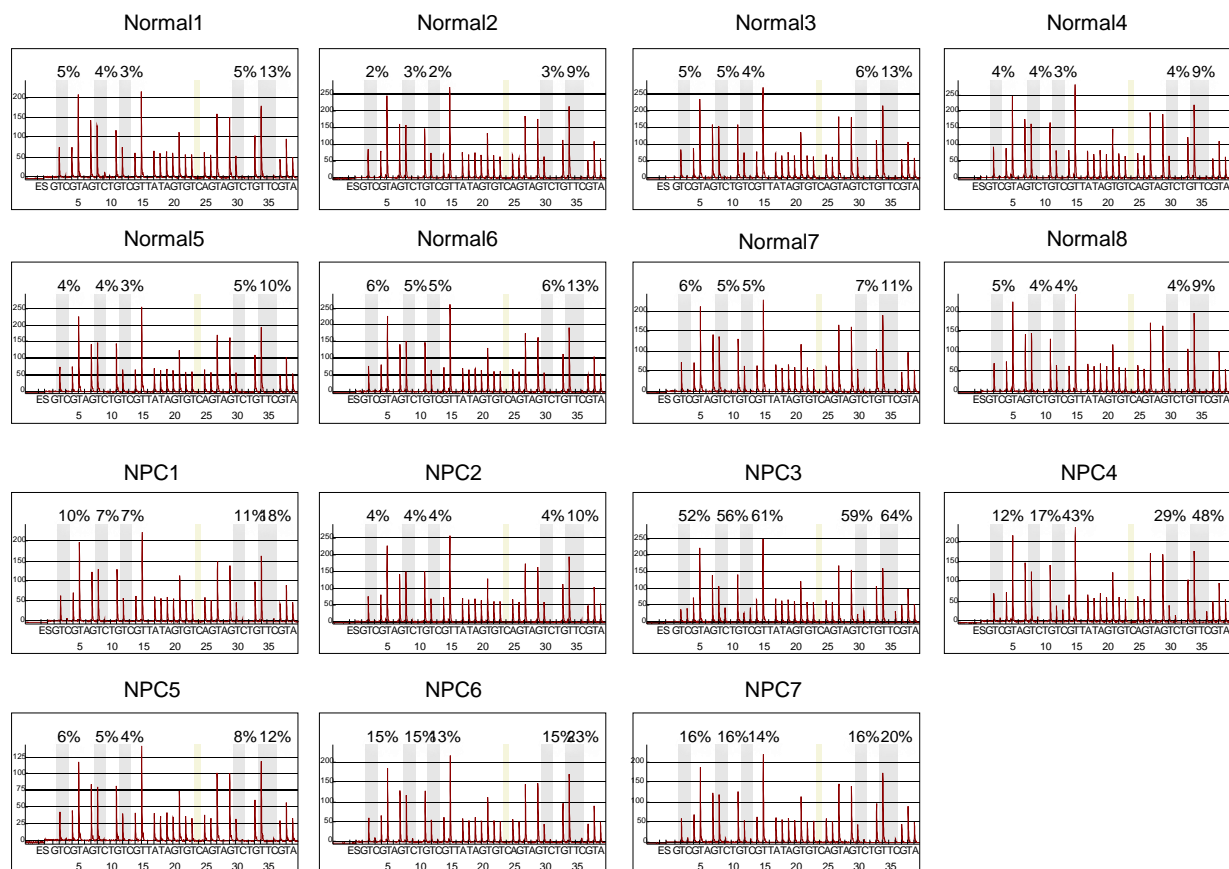

**Supplementary Figure S1 The *UCHL1* is hypermethylated in nasopharyngeal carcinoma tissues.** Bisulfite pyrosequencing analysis of the *UCHL1* promoter region in normal(n=8) and nasopharyngeal carcinoma(n=7) tissues.

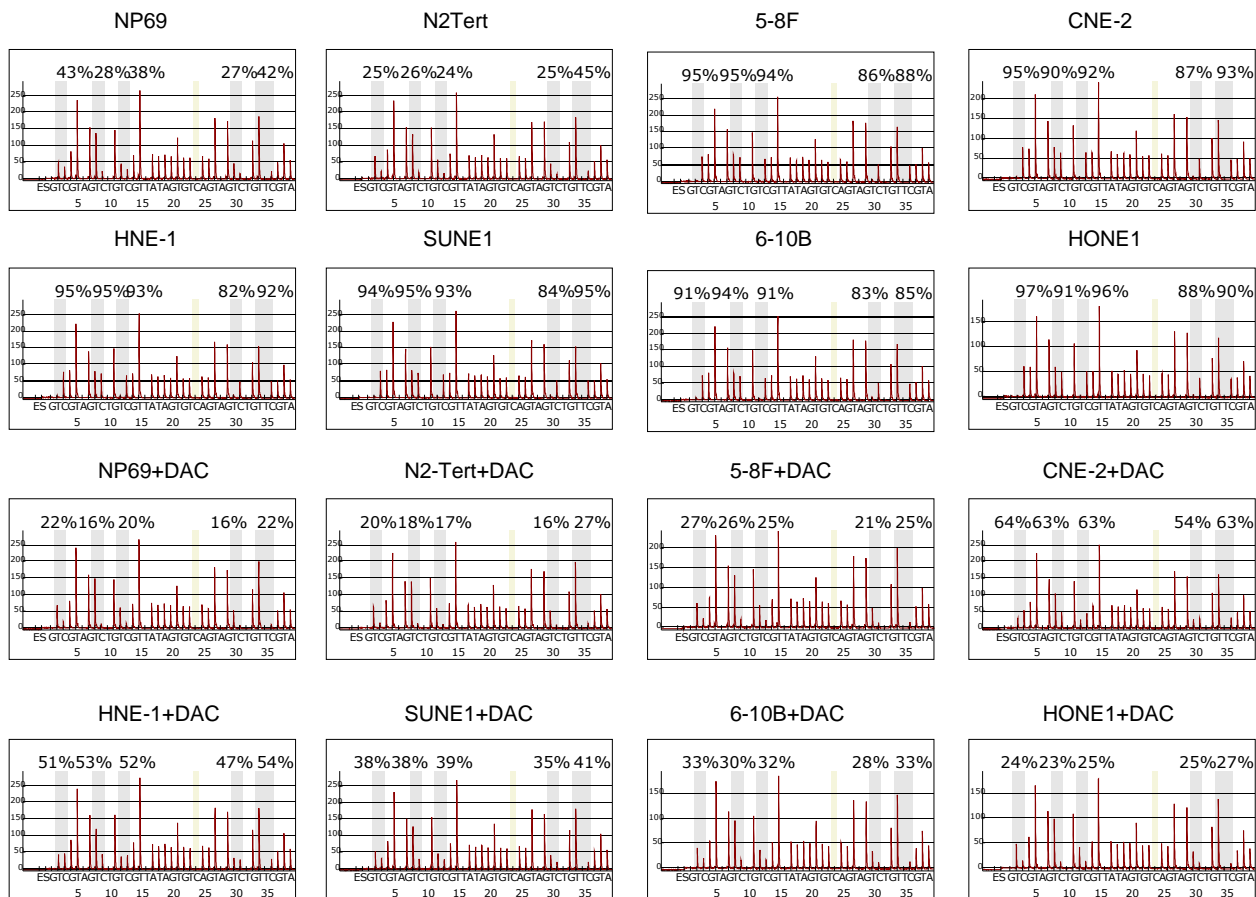

**Supplementary Figure S2** *UCHL1* is hypermethylated in nasopharyngeal carcinoma cell lines. Bisulfite pyrosequencing analysis of the *UCHL1* promoter region in NPEC (NP69, N2-Tert) and NPC (5-8F, CNE2, HNE1, SUNE1, 6-10B, HONE1) cell lines treated with or without DAC.

**A**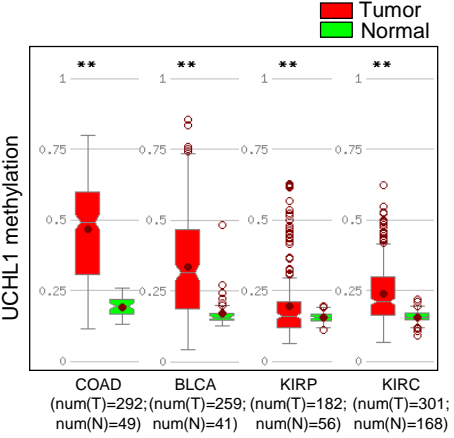**B**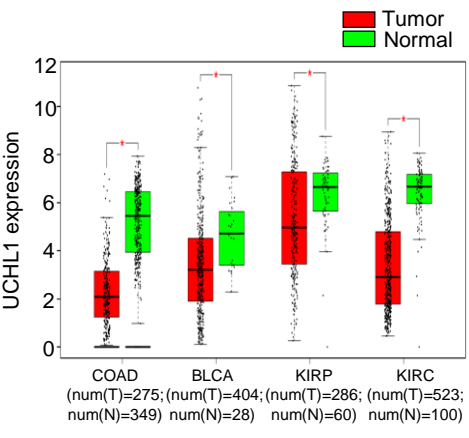**C**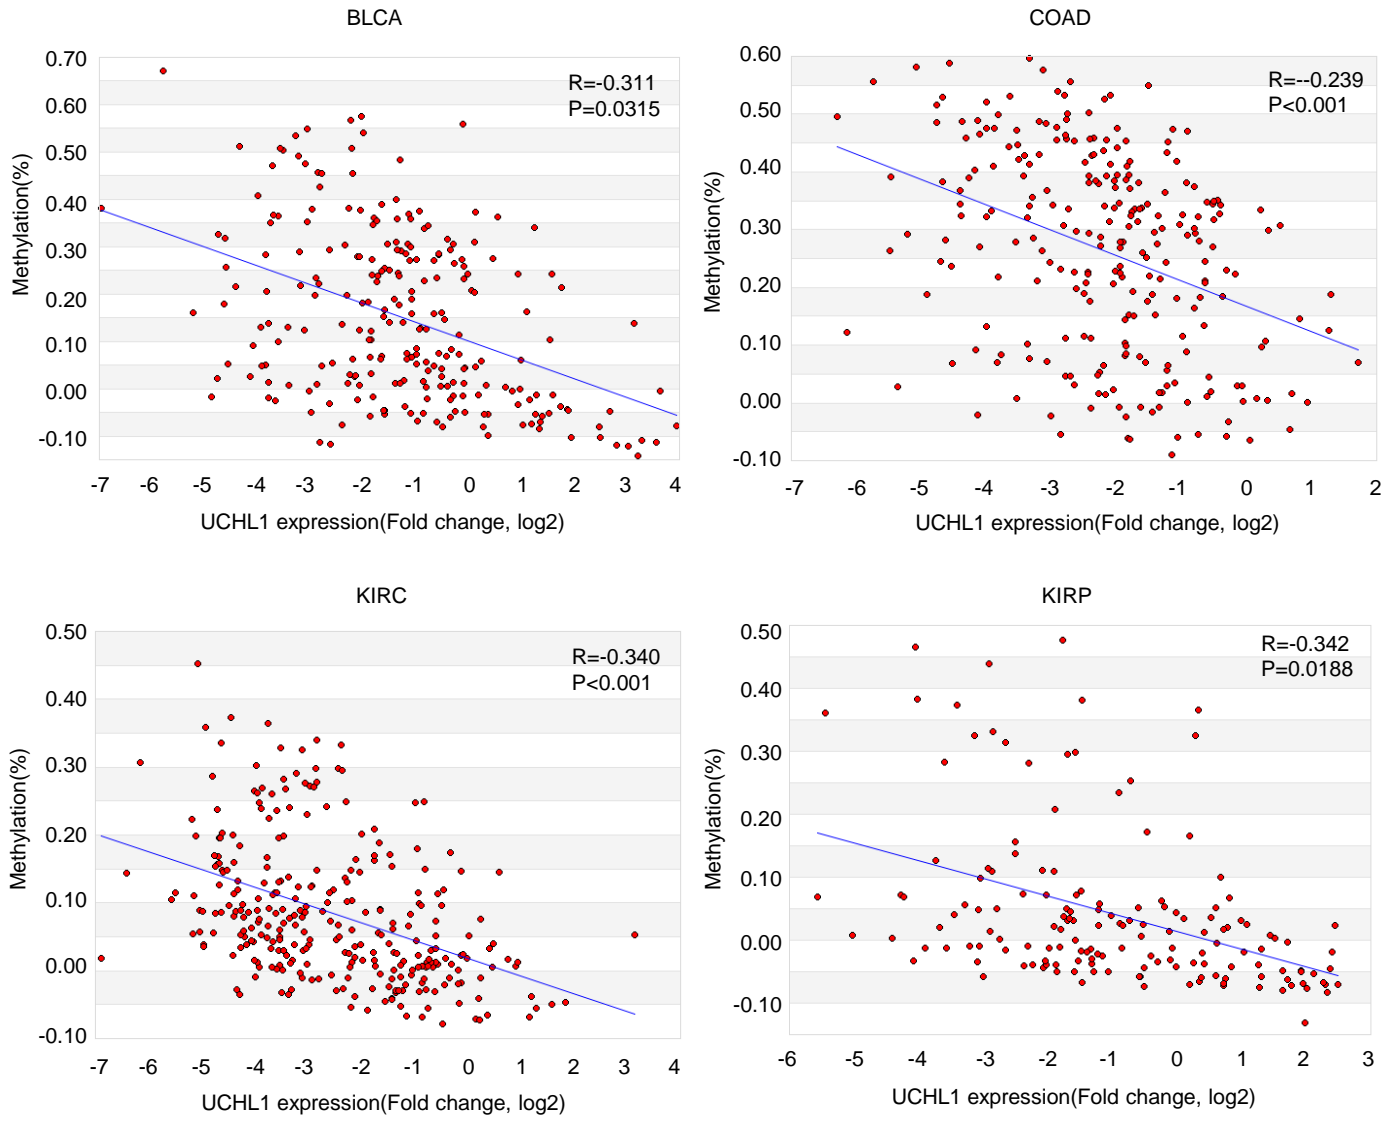

**Supplementary Figure S3 Promoter hypermethylation mediates downregulation of UCHL1 in four types of solid tumor.** (A) UCHL1 methylation levels in normal and tumor tissues(CAOD; BLCA; KIRP; KIRC) analyzing in the MethHC database.(B) Relative expression of UCHL1 in normal and tumor tissues(CAOD; BLCA; KIRP; KIRC) analyzing by the GEPIA website.(C)Correlation analysis between UCHL1 methylation(%) and UCHL1 mRNA expression(Fold change, log2) in normal and tumor tissues(CAOD; BLCA; KIRP; KIRC) in the MethHC database. (\* indicated  $P < 0.05$ ; \* \* indicated  $P < 0.01$ ).

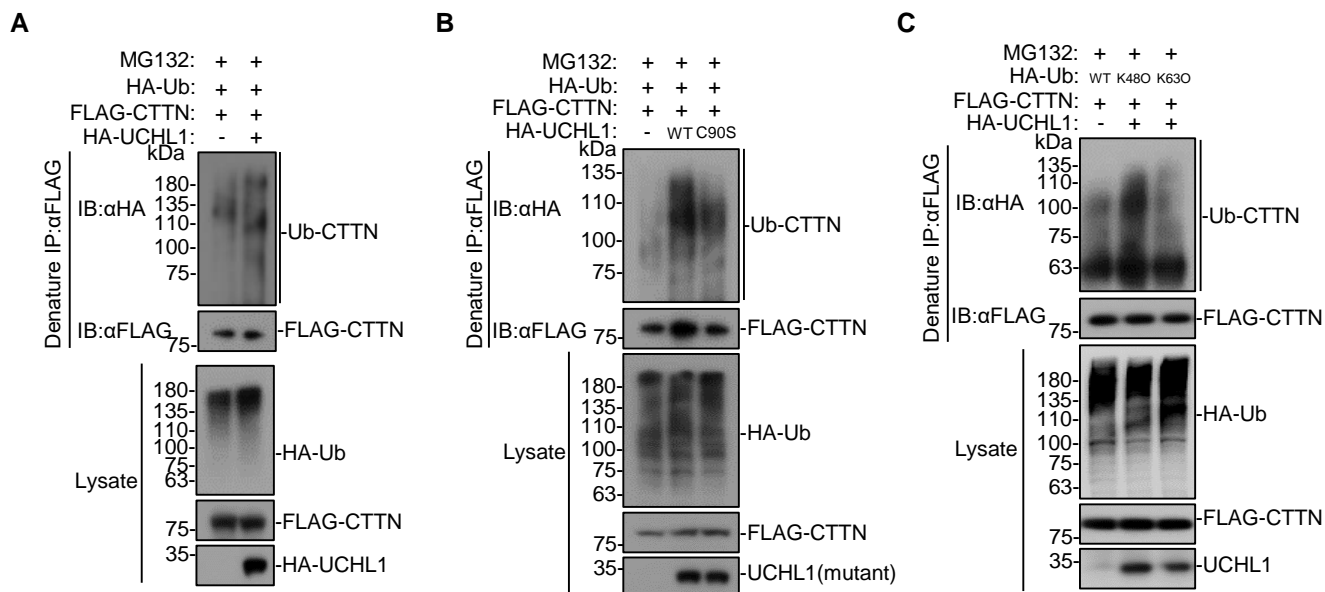

**Supplementary Figure S4 UCHL1 targets CTTN for K48-linked ubiquitination.** (A-B) Denature-immunoprecipitation (Denature-IP) (with anti-FLAG) and immunoblot analysis (with anti-FLAG, anti-HA, or anti-UCHL1) of HEK293 cells transfected with plasmids encoding FLAG-CTTN, HA-Ubiquitin and empty vector, UCHL1 (A), or UCHL1(C90S) (B) for 24 h followed by treatment with MG132 for 6 h. (C) Denature-immunoprecipitation (Denature-IP) (with anti-FLAG) and immunoblot analysis (with anti-FLAG, anti-HA or anti-UCHL1) of HEK293 cells transfected with plasmids encoding FLAG-CTTN and HA-Ubiquitin, HA-Ubiquitin(K48O), or HA-Ubiquitin(K63O) and empty vector or UCHL1 for 24 h followed by treatment with MG132 for 6 h. Data are representative of at least three independent experiments.

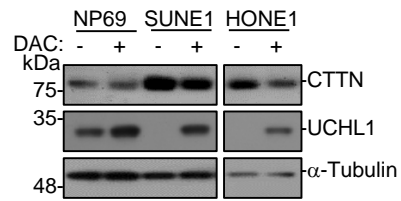

**Supplementary Figure S5 Hypermethylation of UCHL1 suppresses degradation of CTTN.** Immunoblot analysis of CTTN, UCHL1 and  $\alpha$ -Tubulin in NP69, SUNE1 and HONE1 cells treated with or without DAC (10 $\mu$ M). Data are representative of at least three independent experiments.
