# Supplementary material for: Hypermethylation of UCHL1 Promotes Metastasis of Nasopharyngeal Carcinoma by Suppressing Degradation of Cortactin (CTTN)
Source: MDPI journal article supplement (doi:10.3390/cells9030559), 2020-02-27
Supplement: s1 [file s1 › Supplementary Table S1.docx]

Supplementary Table S1. Primers used in this study

| Gene | Sequence (5’ to 3’) |
| --- | --- |
| **BSP PCR primers** |  |
| UCHL1-F | GGGGGGTTAGTATTTATTTGGT |
| UCHL1-R | CTCACCTCCAAATTAATCTCCA |
| **BSP sequencing primers** |  |
| UCHL1 | TTTTTTGTATAGGTTTAATAGTG |
| **qRT-PCR primers** |  |
| UCHL1-F | AGCTCAAGCCGATGGAGATC |
| UCHL1-R | CCCTTCAGCTCTTCAATCTG |
| CTTN-F | AGGTGTCCTCTGCCTACCAGAA |
| CTTN-R | CCTGCTCTTTCTCCTTAGCGAG |
| GAPDH-F | GTCTCCTCTGACTTCAACAGCG |
| GAPDH-R | ACCACCCTGTTGCTGTAGCCAA |
| **shRNA sequences** |  |
| shUCHL1#1-F | GGGTAGATGACAAGGTGAATT |
| shUCHL1#1-R | AATTCACCTTGTCATCTACCC |
| shUCHL1#2-F | GGATGGCCACCTCTATGAACT |
| shUCHL1#2-R | AGTTCATAGAGGTGGCCATCC |
