# Supplementary material for: Hypermethylation of UCHL1 Promotes Metastasis of Nasopharyngeal Carcinoma by Suppressing Degradation of Cortactin (CTTN)
Source: MDPI journal article supplement (doi:10.3390/cells9030559), 2020-02-27
Supplement: s1 [file s1 › Supplementary Table S2.docx]

Supplementary **Table S2.** Sequencing of anti-FLAG-UCHL1 immunoprecipitation complex by mass spectrometry. Accession: unique protein identification number; Σ#PSMs: the number of peptides ions matched that associated protein

| Accession | Description | Σ#PSMs |
| --- | --- | --- |
| MYH9 | Myosin-9 | 106 |
| MYH10 | Myosin-10 | 29 |
| MYH11 | Myosin-11 | 16 |
| IGKV2D-29 | Immunoglobulin kappa variable 2D-29 | 4 |
| CTTN | Src substrate cortactin | 6 |
| UCHL1 | Ubiquitin carboxyl-terminal hydrolase isozyme L1 | 11 |
| DBN1 | Drebrin | 3 |
| FLG2 | Filaggrin-2 | 2 |
| TPM4 | Tropomyosin alpha-4 | 5 |
| TPM3 | Tropomyosin alpha-3 | 5 |
| MYO1B | Unconventional myosin-Ib | 3 |
| EEF1A1P5 | Putative elongation factor 1-alpha-like 3 | 4 |
| HSP90AA1 | Heat shock protein HSP 90-alpha | 3 |
| YWHAZ | 14-3-3 protein zeta/delta | 1 |
| FUS | RNA-binding protein FUS | 1 |
| HSP90AB1 | Heat shock protein HSP 90-beta | 3 |
| DCD | Dermcidin | 2 |
| METTL3 | N6-adenosine-methyltransferase catalytic subunit | 2 |
| RPS4X | 40S ribosomal protein S4, X isoform | 1 |
| TUBB2B | Tubulin beta-2B | 1 |
| PLA2G4B | Cytosolic phospholipase A2 beta | 1 |
| RPL17 | 60S ribosomal protein L17 | 1 |
| RPS27A | Ubiquitin-40S ribosomal protein S27a | 2 |
| CIP2A | Protein CIP2A | 1 |
| TRAF4 | TNF receptor-associated factor 4 | 1 |
| CCDC66 | Coiled-coil domain-containing protein 66 | 1 |
| XP32 | Skin-specific protein 32 | 1 |
| HRNR | Hornerin | 1 |
| USP17L24 | Ubiquitin carboxyl-terminal hydrolase 17-like protein 24 | 1 |
| IGG1 | Immunoglobulin gamma-1 heavy chain | 1 |
| RPL18A | 60S ribosomal protein L18a | 1 |
| WDR82 | WD repeat-containing protein 82 | 1 |
| BAZ1A | Bromodomain adjacent to zinc finger domain protein 1A | 1 |
| ALB | Serum albumin | 1 |
| MYO1C | Unconventional myosin-Ic | 1 |
| MRRF | Ribosome-recycling factor, mitochondrial | 1 |
| PDE8B | High affinity cAMP-specific and IBMX-insensitive 3~,5~cyclic phosphodiesterase 8B | 1 |
| ENO1 | Alpha-enolase | 1 |
| TGM4 | Protein-glutamine gamma-glutamyltransferase 4 | 1 |
| LAMA3 | Laminin subunit alpha-3 | 1 |
| CD163 | Scavenger receptor cysteine-rich type 1 protein M130 | 1 |
| RXYLT1 | Ribitol-5-phosphate xylosyltransferase 1 | 1 |
| SLC22A4 | Solute carrier family 22 member 4 | 1 |
| SYTL4 | Synaptotagmin-like protein 4 | 1 |
| SPATA7 | Spermatogenesis-associated protein 7 | 1 |
| IL16 | Pro-interleukin-16 | 1 |
| KCNB1 | Potassium voltage-gated channel subfamily B member 1 | 1 |
| DNAH12 | Dynein heavy chain 12, axonemal | 1 |
| FKBP10 | Peptidyl-prolyl cis-trans isomerase FKBP10 | 1 |
| SYT15 | Synaptotagmin-15 | 1 |
| SCN3A | Sodium channel protein type 3 subunit alpha | 1 |
| ZNF44 | Zinc finger protein 44 | 1 |
| ZNF792 | Zinc finger protein 792 | 1 |
| C9orf131 | Uncharacterized protein C9orf131 | 1 |
| ANKRD6 | Ankyrin repeat domain-containing protein 6 | 1 |
| SYNM | Synemin | 1 |
| RB1 | Retinoblastoma-associated protein | 1 |
| DSP | Desmoplakin | 1 |
| USP8 | Ubiquitin carboxyl-terminal hydrolase 8 | 1 |
| YQ032 | Putative uncharacterized protein FLJ46089 | 1 |
| ANR31 | Putative ankyrin repeat domain-containing protein 31 | 1 |
| CYS1 | Cystin-1 | 1 |
| DSG1 | Desmoglein-1 | 1 |
| ATX2L | Ataxin-2-like protein | 1 |
| STAT4 | Signal transducer and activator of transcription 4 | 1 |
| DNMT1 | DNA (cytosine-5)-methyltransferase 1 | 1 |
